# Supplementary material
Source: Springer Nature journal article supplement (https://www.springermedizin.de/resource/supplementary/12885_2010_2812_MOESM1_ESM.pdf/9462064)
Supplement: MOESM1 [file 9462064]

**3,915** Invitation letters sent to eligible mother-daughter pairs based on electronic data on age and mammogram

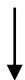

**304** Mothers with daughters expressed interest in study

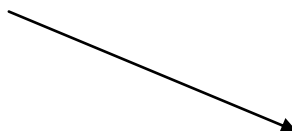

**166** Mothers with daughters found ineligible due to:

- 50 No mammograms
- 42 Age
- 18 Biological mother/daughter not available
- 18 History of breast cancer/surgery or abnormal mammogram/biopsy
- 12 Breast implants
- 10 Not interested/unable to contact
- 9 Daughter with no breast development
- 4 Off island
- 3 Health problems

**138** Eligible mothers with eligible daughters scheduled study visits

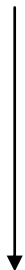

**101** mothers with daughters completed study:

- 89 mothers with one daughter
- 12 mothers with 2 daughters
